# Supplementary material for: RNA helicase p68 inhibits the transcription and post-transcription of Pkd1 in ADPKD
Source: PubMed Central journal article supplement (PMC7381742; doi:10.7150/thno.47315), 2020-07-09
Supplement: thnov10p8281s1.pdf [file thnov10p8281s1.pdf]

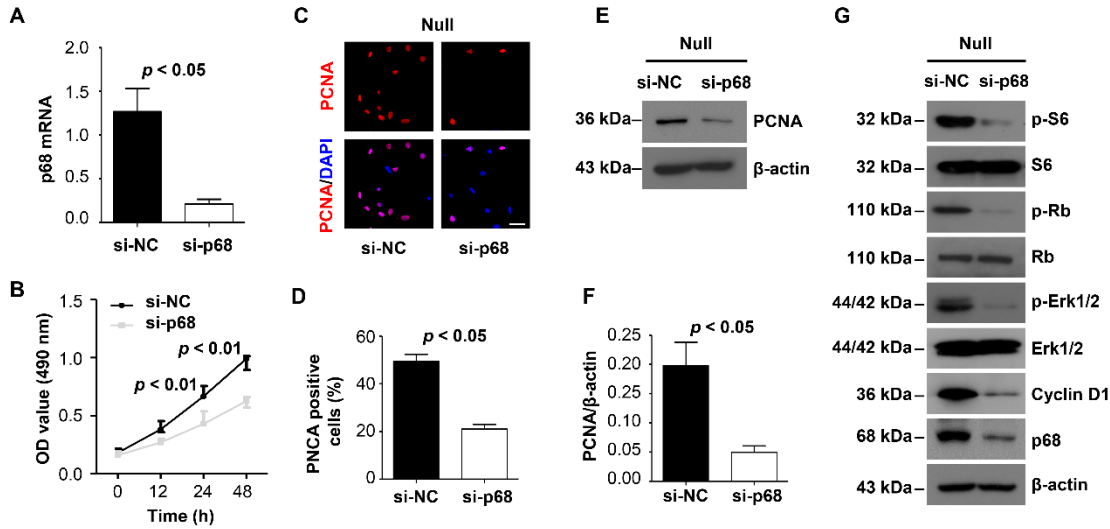

**Supplemental Figure 1. p68 promotes *Pkd1* null MEK cells proliferation by activating ERK, mTOR, and Rb pathways.** (A) The expression of p68 was examined with qRT-PCR analysis in *Pkd1* null MEK cells transfected with p68 siRNA or control siRNA for 48 h. (B) Cell growth of *Pkd1* null MEK cells transfected with p68 siRNA or control siRNA was determined by MTT assay. (D to F) The expression of PCNA in *Pkd1* null MEK cells transfected with p68 siRNA or control siRNA for 48 h was examined with PCNA staining (C, D) and Western blotting (E, F). Scale bars, 50  $\mu$ m. (G) Western blot analysis of the expression of Cyclin D1 and the phosphorylation of ERK, S6 and Rb as well as the total levels of these proteins in *Pkd1* null MEK cells transfected with p68 siRNA or control siRNA for 48 h.

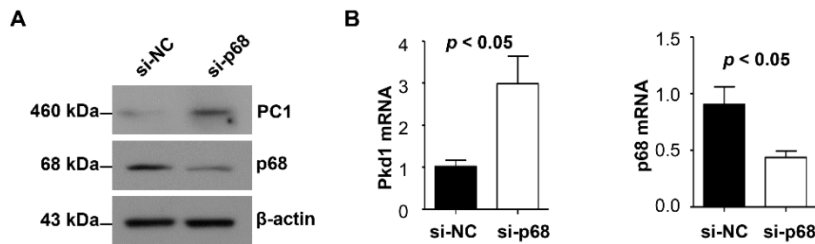

**Supplemental Figure 2. Knockdown of p68 delays spheroid (cyst) growth in mIMCD3 cell 3D cultures.** The expression of *Pkd1* and p68 was examined with Western blot (A) and qRT-PCR (B) analysis in 3D cultures of mIMCD3 cells transfected with p68 siRNA or negative control siRNA.
